# Supplementary material for: Importance of Immediate Electronic-based Feedback to Enhance Feedback for First-time CPR Trainees
Source: Research Square preprint supplement (doi:10.21203/rs.3.rs-148427/v1), 2021-02-05
Supplement: Supplementary file 1 [file b93270fb652c5953bc719978.docx]

**Supplementary File 1.**

**Questionnaire**

**for article:**

**Importance of Immediate Electronic-based Feedback to Enhance Feedback for First-time CPR Trainees**

Patrycja Misztal-Okońska 1*, Krzysztof Goniewicz 2,*, Mariusz Goniewicz 1, Jamie Ranse 3,4, Attila J Hertelendy5,6,7, Lesley Gray 8,9, Eric Carlström10,11,12 Jarle Løwe Sørensen12 and Amir Khorram-Manesh13,14

1 Department of Emergency Medicine, Medical University of Lublin, Lublin, Poland;

2 Department of Aviation Security, Military University of Aviation, Dęblin, Poland;

3  School of Nursing and Midwifery, Griffith University, Gold Coast, Queensland, Australia;

4 Department of Emergency Medicine, Gold Coast Health, Gold Coast, Queensland, Australia;

5 Fellowship in Disaster Medicine, Department of Emergency Medicine, Beth Israel Deaconess Medical Centre, Boston, Massachusetts, USA;

6 Department of Emergency Medicine, Harvard Medical School, Boston, Massachusetts, USA;

7 Department of Information Systems and Business Analytics, College of Business, Florida International University, Miami, Florida, USA;

8 Department of Primary Health Care and General Practice, University of Otago, Wellington, New Zealand;

9 Joint Centre for Disaster Research, Massey University, Wellington, New Zealand;

10 Gothenburg Emergency Medicine Research Group (GEMREG), Sahlgrenska University Hospital, Gothenburg, Sweden

11 Institute of Health and Care Sciences, Sahlgrenska Academy, University of Gothenburg, Gothenburg, Sweden

12 USN School of Business, University of South-Eastern Norway, Kongsberg, Norway

13 Institute of Clinical Sciences, Department of Surgery, Sahlgrenska Academy, Gothenburg University, 413 45 Gothenburg, Sweden;

14 Research Advisor, Department of Development and Research, Armed Forces Center for Defense Medicine, Gothenburg, 426 76 Västra Frölunda, Sweden.

*Correspondence: Patrycja Misztal-Okońska: [patrycja.okonska@umlub.pl](mailto:patrycja.okonska@umlub.pl) and Krzysztof Goniewicz: k.goniewicz@law.mil.pl

**Supplementary File 1.**

**Questionnaire**

*Please read the questionnaire carefully and fill it in. When answering, please tick the appropriate boxes. The survey is completely anonymous. Your responses will only be used for statistical summaries.*

1. **How would you rate your motivation to learn CPR on a simple mannequin that gives green or red light feedback (good / bad). Did you have a strong desire to improve your skills while practicing on this mannequin?**

I have no motivation 1 2 3 4 5 6 7 8 9 10 I have motivation

1. **How do you evaluate your motivation to learn CPR on a high-fidelity mannequin that provides detailed projector feedback on a large screen. While learning on this mannequin, did you have a strong desire to improve your skills?**

I have no motivation 1 2 3 4 5 6 7 8 9 10 I have motivation

1. **Did it bother you that the effect of your work was displayed on the projector screen or did it motivate you to work better?**

- it bothered me, it intimidated me
- motivated me to work better, to improve my skills
- it did not bother me or motivate me
- Other:

1. **How would you rate your CPR skills overall?**

Very low 1 2 3 4 5 6 7 8 9 10 Very Good

1. **Do you think simple low fidelity mannequins are sufficient to teach first aid as part of your field of study or should classes be taught on high fidelity mannequins with advanced feedback?**

- simple low fidelity phantoms are sufficient
- classes should be conducted on high fidelity phantoms with detailed feedback

1. **Faculty**

**•** Dietetics

• Physiotherapy

• Cosmetology

• Medical Rescue

• Other:

1. **Year of study:**

- First
- Second
- third

1. **Gender**

- Male
- Female

1. **Age**

- 19
- 20
- 21
- 22
- 23
- 24
- Other
